# Supplementary material for: Lactobacillus rhamnosus TR08 Improves Dyslipidemia in Mice Fed with a High Fat Diet by Regulating the Intestinal Microbiota, Reducing Systemic Inflammatory Response, and Promoting Sphingomholipid Metabolism
Source: MDPI journal article supplement (doi:10.3390/molecules27217357), 2022-10-29
Supplement: s1 [file s1]

## Supplementary materials

**Table S1 The primers for qPCR of various genera of bacteria**

| Genera                 | Primers (5'-3)'                                          |
|------------------------|----------------------------------------------------------|
| <i>Escherichia</i>     | F: TGCCGTAACCTTCGGGAGAAGGCA<br>R: TCAAGGACCAGTGTTCAGTGTC |
| <i>Enterococcus</i>    | F: CCCTTATTGTTAGTTGCCATCATT<br>R: ACTCGTTGTACTTCCCATTGT  |
| <i>Bifidobacterium</i> | F: CGGGTGAGTAATGCGTGACC<br>R: TGATAGGACGCGACCCCA         |
| <i>Bacteroides</i>     | F: AGCAGTAGGGAATCTTCCA<br>R: CAGGGCTACACATGGAG           |

**Table S2 The primers of inflammation factors in mouse spleen by qRT-PCR**

| Genes                               | Primers (5'-3)'                                        |
|-------------------------------------|--------------------------------------------------------|
| <i>Mun-<math>\beta</math>-actin</i> | F: ATGACCCAAGCCGAGAAGG<br>R: CGGCCAAGTCTTAGAGTTGTTG    |
| <i>Mun-IL-2</i>                     | F: ACACCTTTAATTGGTCAACACGA<br>R: CCTGCTACGTTCTCTACCTCT |
| <i>Mun-IFN-<math>\gamma</math></i>  | F: GAACTGGCAAAAGGATGGTGA<br>R: TGTGGGTTGTTGACCTCAAAC   |
| <i>Mun-IL-4</i>                     | F: GGTCTCAACCCCCAGCTAGT<br>R: GCCGATGATCTCTCTCAAGTGAT  |
| <i>Mun-IL-10</i>                    | F: GAAGCTCCCTCAGCGAGGACA<br>R: TTGGGCCAGTGAGTGAAAGGGG  |
